# Supplementary material
Source: Springer Nature journal article supplement (https://www.springermedizin.de/resource/supplementary/12969_2012_939_MOESM2_ESM.pdf/9588810)

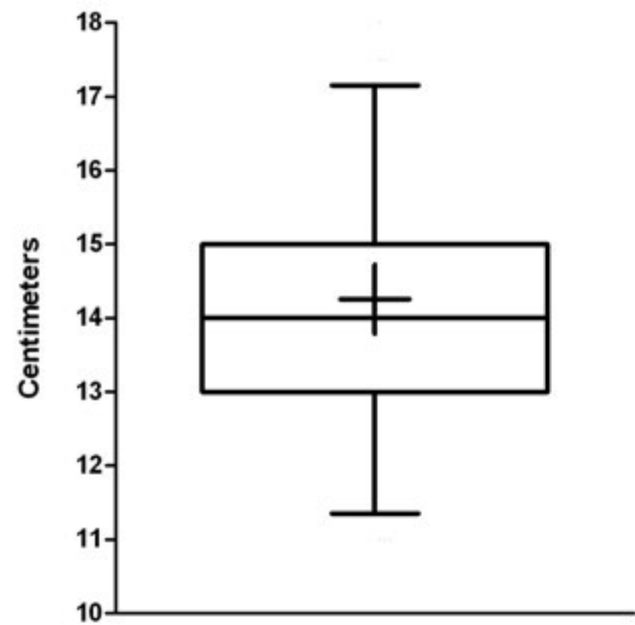

Schober's Measurement

**A**

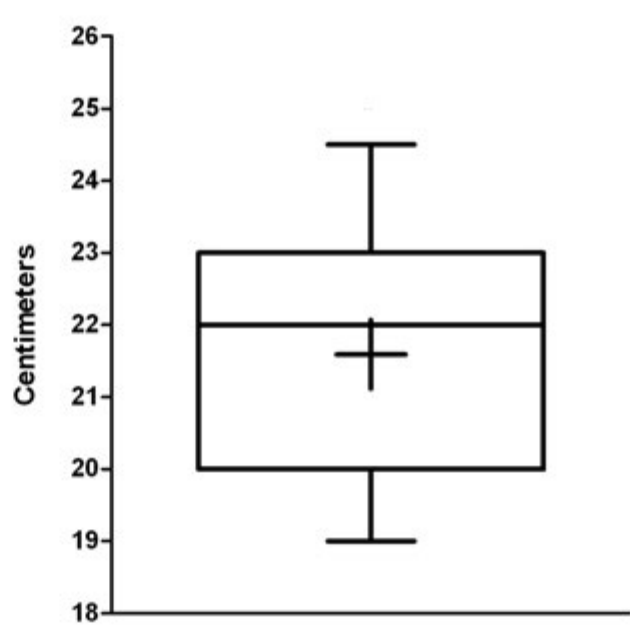

Modified Schober's Measurement

**B**

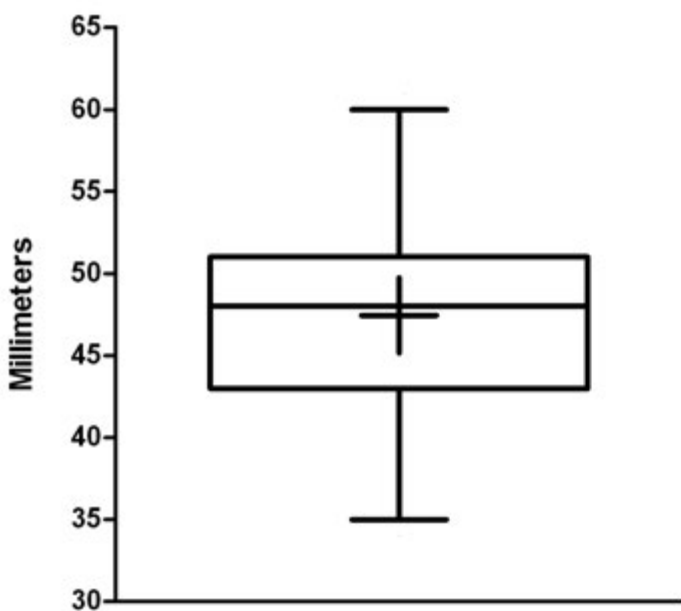

Tooth to Tooth Gap

**C**

Supplement: MOESM2 [file 9588810]
